# Supplementary material
Source: PubMed Central journal article supplement (PMC4082761)
Supplement: NIHMS559663-supplement-01.pdf [file NIHMS559663-supplement-01.pdf]

## Appendix 1.

Two MRSS Apps for iPhone/iPad, one for the AREDS and the other for the BMES, have been developed and will be available in App Store at apple.com. Using our MRSS algorithm (**Formula 2**), the App will be easily adaptable to other populations.

$MRSS_{AREDS} = -4.48 + \sum MR_j$ ;  $MRSS_{BMES} = -2.28 + \sum MR_j$ . The  $MR_i$  are adapted from the MRSS as shown in **Table 1**.

App development team: Chung-Jung Chiu, Yu-Hsuan Chiu, and Min-Lee Chang.

Abbreviation: **MRSS**, macular risk scoring system; **App**, application software; **AREDS**, Age-Related Eye Disease Study; **BMES**, Blue Mountains Eye Study.

# MRSS iPhone App for AREDS

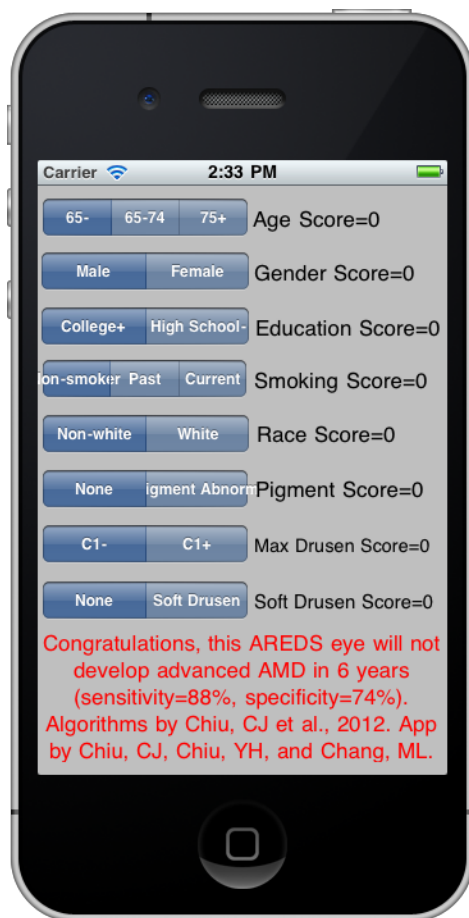

Default launch page

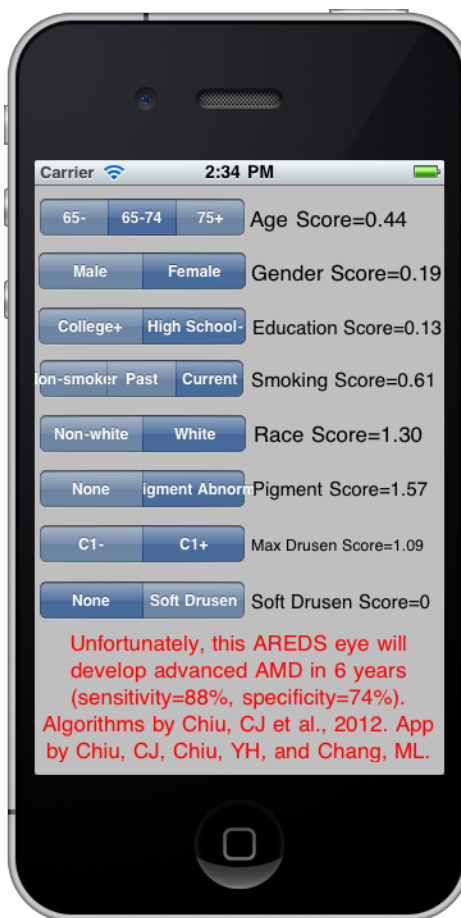

Prediction for Case 1

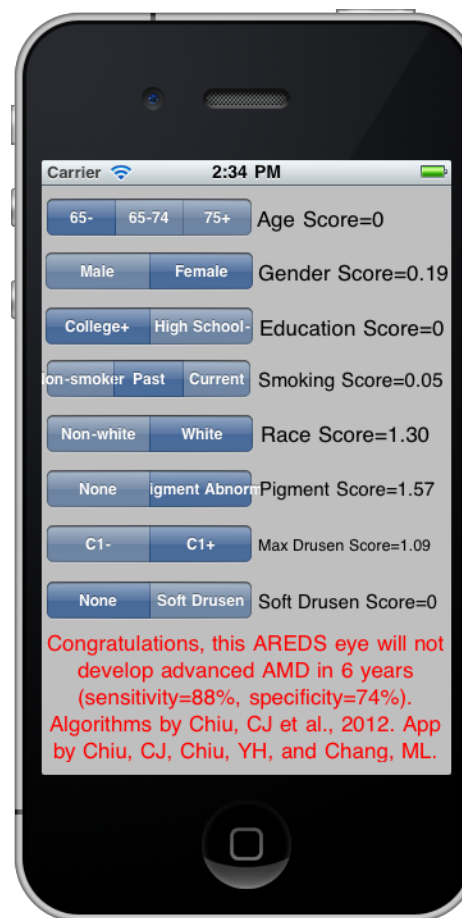

Prediction for Case 2

# MRSS iPhone App for BMES

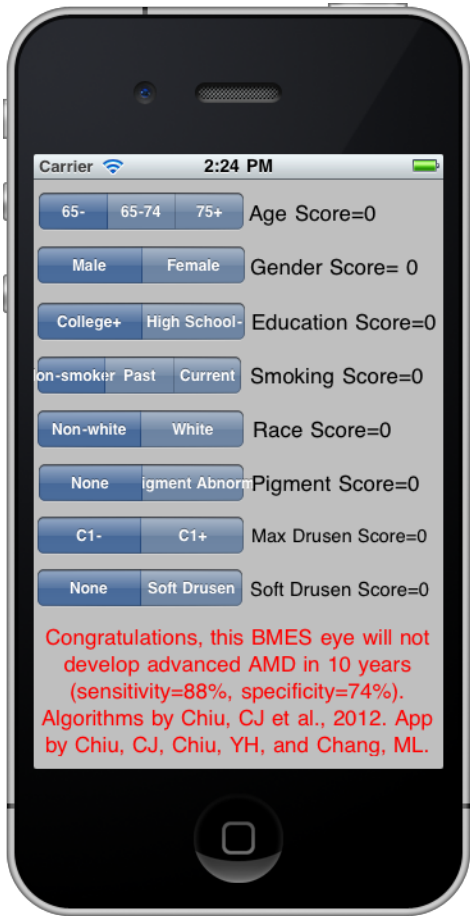

Default launch page

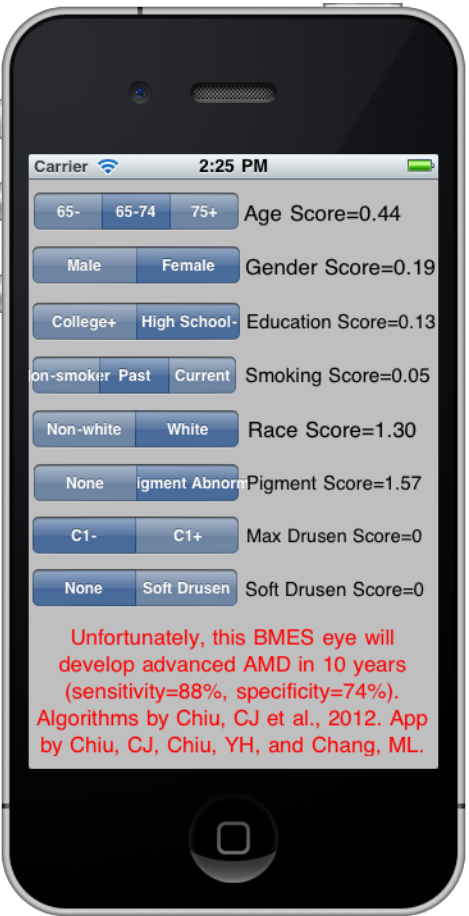

Prediction for Case 1

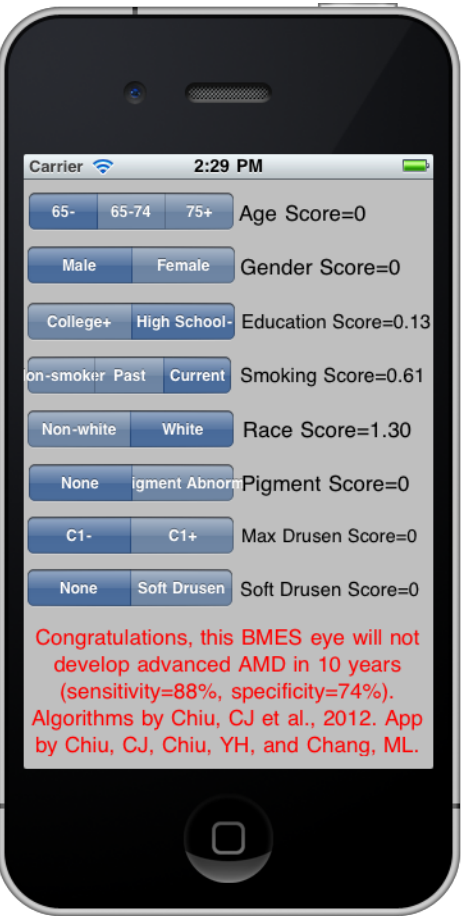

Prediction for Case 2
